# Supplementary material for: Detection of Human Microchimerism following Allogeneic Cell Transplantation Using Droplet Digital PCR
Source: Hindawi journal article supplement (doi:10.1155/2019/8129797), 2019-06-12
Supplement: f1 [file 8129797.f1.pdf]

## **SUPPLEMENTARY MATERIALS AND METHODS**

### **Validation of the chimerism detection method by ddPCR**

#### *Inhibitions*

Biopsy samples positive for the gene of interest or spiked with the corresponding gDNA were analyzed in ddPCR using 120 and 12ng of DNA. The results were expressed as the ratio of the number of droplets positive for the gene of interest over the number of droplets positive for RNase P.

#### *Precision*

Precision is defined as the degree to which repeated measurements under unchanged conditions show the same results [1]. To test the technique's precision, we verified that the results obtained were independent of the timing of the experiment and the operator. To this end, two identical ddPCR analyses were performed by the same operator a few days apart, and two were performed by two different operators using 120ng of DNA from samples with 1.56% of input donor DNA.

#### *Accuracy*

Accuracy is defined as the degree of closeness of a measured value to the true value [1]. The accuracy of the assay was evaluated using artificial chimerism samples (120ng of DNA) corresponding to input donor DNA of 100%, 25%, 6.25%, 1.56%, 0.39%, 0.098%, 0.024% and 0.0061%.

## SUPPLEMENTARY RESULTS

### Evaluation of donor/recipient microchimerism by ddPCR

#### *Validation of the technique*

Precision of the ddPCR method was assessed by two different operators in 3 independent experiments looking at repeatability (intra-operator precision) and reproducibility (inter-operator precision) using artificial microchimerism samples containing 1.56% of input donor DNA. The CVs obtained were all below 13 % for intra-operator precision, and below 12% for inter-operator precision. (Table S1)

| Assay       | Gene   | intra-operator CV | inter-operator CV |
|-------------|--------|-------------------|-------------------|
| SRY Assay   | SRY    | 8,21              | 11,59             |
|             | RNAseP | 2,96              | 2,13              |
| RHD assay   | RHD    | 5,52              | 7,59              |
|             | RNAseP | 3,8               | 2,65              |
| TRY6 assay  | TRY6   | 6,95              | 6,47              |
|             | RNAseP | 2,08              | 2,3               |
| LEC3C assay | LEC3C  | 12,48             | 11,77             |
|             | RNAseP | 7,47              | 6,09              |
| GSTM1 assay | GSTM1  | 4,84              | 7,77              |
|             | RNAseP | 2,14              | 5,05              |
| GSTT1 assay | GSTT1  | 6,06              | 5,71              |
|             | RNAseP | 4,44              | 4,02              |

#### **Supplementary Table S1. Precision**

CV :coefficient of variation

The presence or absence of inhibitions was investigated by testing 3 different biopsies with 120ng and 12ng of DNA input and evaluating the variation in the ratio (between the number

of droplets positive for the gene of interest over the number of droplets positive for the reference gene RNase P). We did not observe any inhibition for SRY, RHD, LEC3C, GSTM1, and GSTT1 (Table S2). One biopsy tested for TRY6 showed a slightly higher variation but it remained close to 10% (11.2%) while the other two biopsies showed acceptable variation.

| Gene  | Sample | Difference between 120ng and 12 ng (%) |
|-------|--------|----------------------------------------|
| SRY   | S1     | 1,1                                    |
|       | S2     | 0,8                                    |
|       | S3     | 0,3                                    |
| RHD   | S1     | -2,7                                   |
|       | S2     | -3,8                                   |
|       | S3     | 0,2                                    |
| TRY6  | S1     | 11,2                                   |
|       | S2     | 2,7                                    |
|       | S3     | 8                                      |
| LEC3C | S1     | -3,2                                   |
|       | S2     | 3,6                                    |
|       | S3     | 1                                      |
| GSTM1 | S1     | 4,3                                    |
|       | S2     | 0,2                                    |
|       | S3     | 1,3                                    |
| GSTT1 | S1     | 2,7                                    |
|       | S2     | 2,7                                    |
|       | S3     | 0,8                                    |

**Supplementary Table S2. Inhibitions**

S : sample

The technique's accuracy was evaluated by determining the difference between the observed concentrations and the theoretical concentrations of artificial chimerism (Table S3).

|     | Expected percentage | observed percentage | difference | % difference (absolute value) |
|-----|---------------------|---------------------|------------|-------------------------------|
| SRY | 100                 | 102,466667          | 2,466667   | 2,47                          |

|              |        |             |              |              |
|--------------|--------|-------------|--------------|--------------|
|              | 25     | 27,933333   | 2,933333     | <b>11,73</b> |
|              | 6,25   | 7,406667    | 1,156667     | 18,51        |
|              | 1,52   | 1,918667    | 0,398667     | 26,23        |
|              | 0,39   | 0,490667    | 0,100667     | 25,81        |
|              | 0,098  | 0,121133    | 0,023133     | 23,61        |
|              | 0,024  | 0,034733    | 0,010733     | 44,72        |
|              | 0,0061 | 0,004780    | -0,001320    | 21,64        |
| <b>TRY6</b>  | 100    | 69,266667   | -30,73333333 | 30,73        |
|              | 25     | 18,300000   | -6,7         | 26,80        |
|              | 6,25   | 4,676667    | -1,573333333 | 25,17        |
|              | 1,52   | 1,196667    | -0,323333333 | 21,27        |
|              | 0,39   | 0,311667    | -0,078333333 | 20,09        |
|              | 0,098  | 0,079333    | -0,018666667 | <b>19,05</b> |
|              | 0,024  | 0,023567    | -0,000433333 | <b>1,81</b>  |
|              | 0,0061 | 0,006140    | 4E-05        | <b>0,66</b>  |
| <b>RHD</b>   | 100    | 96,20281    | -3,79719     | <b>3,80</b>  |
|              | 25     | 25,30366    | 0,30366      | <b>1,21</b>  |
|              | 6,25   | 6,35008     | 0,10008      | <b>1,60</b>  |
|              | 1,52   | 1,57688     | 0,05688      | <b>3,74</b>  |
|              | 0,39   | 0,38539     | -0,00461     | <b>1,18</b>  |
|              | 0,098  | 0,10225     | 0,00425      | <b>4,34</b>  |
|              | 0,024  | 0,0203      | -0,0037      | <b>15,42</b> |
|              | 0,0061 | 0,00599     | -0,00011     | <b>1,77</b>  |
| <b>LEC3C</b> | 100    | 103,0088496 | 3,008849558  | <b>3,01</b>  |
|              | 25     | 23,46394984 | 1,536050157  | <b>6,14</b>  |
|              | 6,25   | 5,883280757 | 0,366719243  | <b>5,87</b>  |
|              | 1,52   | 1,462336491 | 0,057663509  | <b>3,79</b>  |
|              | 0,39   | 0,384440843 | 0,005559157  | <b>1,43</b>  |
|              | 0,098  | 0,093989983 | 0,004010017  | <b>4,09</b>  |
|              | 0,024  | 0,021843393 | 0,002156607  | <b>8,99</b>  |
|              | 0,0061 | 0,005559265 | 0,000540735  | <b>8,86</b>  |
| <b>GSTM1</b> | 100    | 100,7117438 | 0,711743772  | <b>0,71</b>  |
|              | 25     | 29,10536779 | 4,105367793  | <b>16,42</b> |
|              | 6,25   | 7,789473684 | 1,539473684  | 24,63        |
|              | 1,52   | 1,967948718 | 0,447948718  | 29,47        |
|              | 0,39   | 0,487420043 | 0,097420043  | 24,98        |
|              | 0,098  | 0,130921053 | 0,032921053  | 33,59        |
|              | 0,024  | 0,028336933 | 0,004336933  | <b>18,07</b> |
|              | 0,0061 | 0,005781316 | -0,000318684 | <b>5,22</b>  |
| <b>GSTT1</b> | 100    | 99,64157706 | -0,358422939 | <b>0,36</b>  |
|              | 25     | 25,1048951  | 0,104895105  | <b>0,42</b>  |
|              | 6,25   | 6,52173913  | 0,27173913   | <b>4,35</b>  |
|              | 1,52   | 1,669595782 | 0,149595782  | <b>9,84</b>  |

|  |        |             |              |             |
|--|--------|-------------|--------------|-------------|
|  | 0,39   | 0,413414634 | 0,023414634  | <b>6,00</b> |
|  | 0,098  | 0,105851064 | 0,007851064  | <b>8,01</b> |
|  | 0,024  | 0,029472759 | 0,005472759  | 22,80       |
|  | 0,0061 | 0,004835664 | -0,001264336 | 20,73       |

### **Supplementary Table S3. Accuracy**

It remained below 20% for RHD, and LEC3C. For GSTT1, the difference was below 20% down to 0.098% of input donor DNA and increased but remained below 23% for the two smallest concentrations. GSTM1 and TRY6 showed differences above 20% in the high percentages of input donor DNA but remained under 20% in the small microchimerism percentages, which are the percentages that we expect in our patients. The gene with the worst accuracy results was SRY, as most of the differences calculated were above 20%.

## SUPPLEMENTARY FIGURE

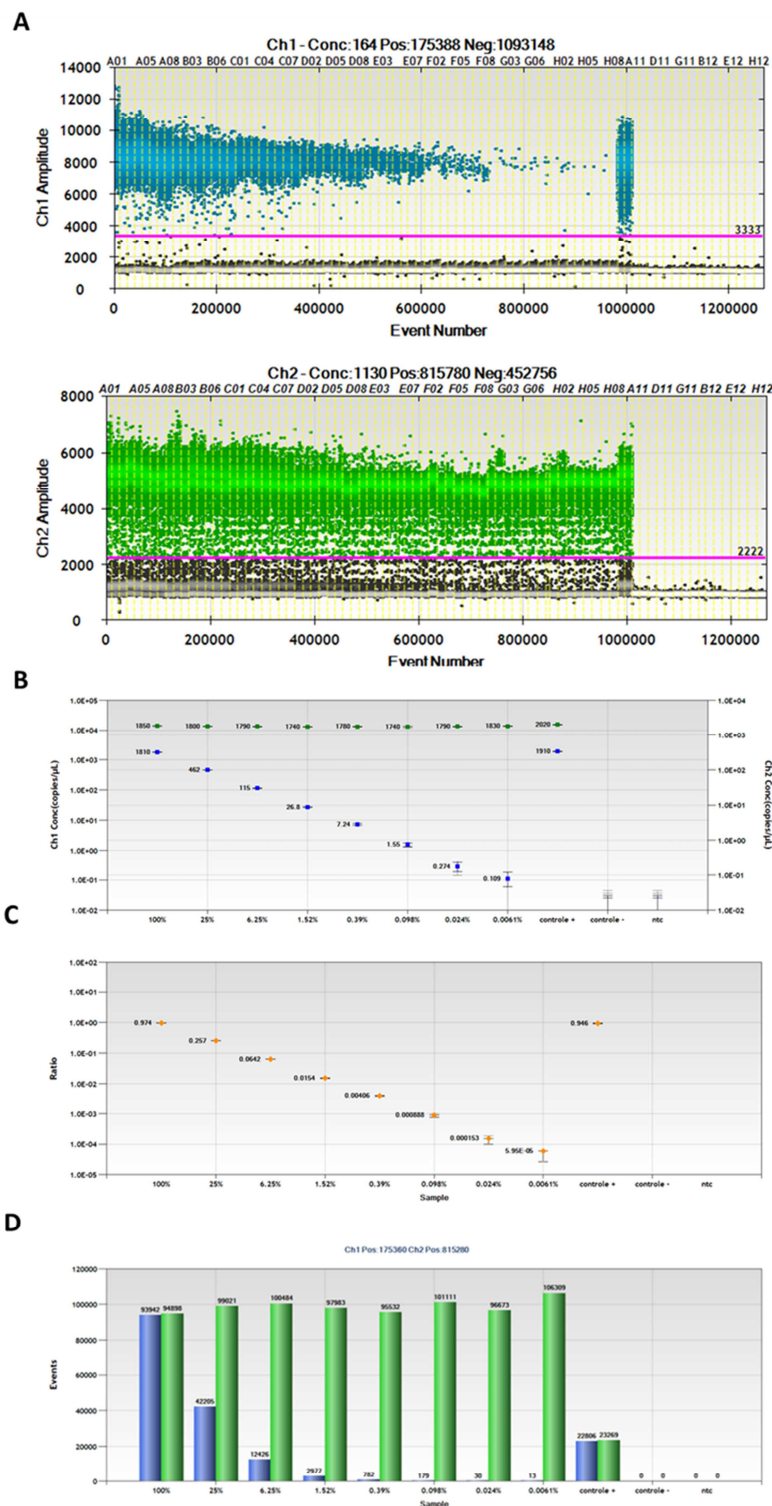

**Figure S1: Representative images of the ddPCR results obtained with the Quantasoft software. A)** Representation of the fluorescence intensity of each droplet in the sample. The positive droplets for the gene of interest (channel 1 : FAM, in blue) show a decrease in

amplitude with dilution, while positive droplets for RNase P (channel 2 : in green) show a constant amplitude. Grey dots are negative droplets. The pink line shows the positivity threshold. **B)** Concentration of the gene of interest (left y axis) and RNase P (Right y axis) are plotted as copies /  $\mu\text{l}$  **C)** Ratio of the gene of interest over RNase P **D)** Total number of positive events for the gene of interest and RNase P.

## REFERENCES

1. Hospodsky D, Yamamoto N, Peccia J: **Accuracy, precision, and method detection limits of quantitative PCR for airborne bacteria and fungi.** *Appl Environ Microbiol* 2010, **76**:7004-7012.
